# Supplementary material for: Mutation spectrums of TSC1 and TSC2 in Chinese women with lymphangioleiomyomatosis (LAM)
Source: PLoS One. 2019 Dec 19;14(12):e0226400. doi: 10.1371/journal.pone.0226400 (PMC6922431; doi:10.1371/journal.pone.0226400)
Supplement: S3 Table — (XLSX) [file pone.0226400.s007.xlsx]

## Sheet: Sheet1
S3 Table : Customed gene panel for target sequencing
Gene Name	Refseq	targeted Region
ALDH1A1	NM_000689	CDS
AQP9	NM_020980	CDS
AR	NM_000044	CDS
ATRX	NM_000489	CDS
BCL2	NM_000633	CDS
BRAF	NM_004333	CDS
CCND1	NM_053056	CDS
EGFR	NM_005228	CDS
ERBB2	NM_004448	CDS
ESR1	NM_001122740	CDS
FGFR1	NM_001174067	CDS
FGFR2	NM_000141	CDS
FGFR3	NM_000142	CDS
FGFR4	NM_213647	CDS
FLT3	NM_004119	CDS
HRAS	NM_001130442	CDS
KIT	NM_000222	CDS
KRAS	NM_033360	CDS
MDM2	NM_002392	CDS
MEK1(MAP2K1)	NM_002755	CDS
MET	NM_000245	CDS
MYC	NM_002467	CDS
MYCN	NM_005378	CDS
NF1	NM_001042492	CDS
NRAS	NM_002524	CDS
PDGFRA	NM_006206	CDS
PGR	NM_000926	CDS
POLE	NM_006231	CDS
PTEN	NM_000314	CDS
RET	NM_020975	CDS
RICTOR	NM_152756	CDS
RUNX1	NM_001754	CDS
SDHA	NM_004168	CDS
SDHB	NM_003000	CDS
SDHC	NM_003001	CDS
SDHD	NM_003002	CDS
TP53	NM_000546	CDS
TSC1	NM_000368	CDS
TSC2	NM_000548	CDS
VHL	NM_000551	CDS
ABL1	NM_005157	Hotspots
AKT1	NM_001014431	Hotspots
ALK	NM_004304	Hotspots
APC	NM_000038	Hotspots
ATM	NM_000051	Hotspots
CDH1	NM_004360	Hotspots
CDKN2A	NM_058195	Hotspots
CSF1R	NM_005211	Hotspots
CTNNB1	NM_001904	Hotspots
DDR2	NM_006182	Hotspots
ERBB4	NM_005235	Hotspots
EZH2	NM_004456	Hotspots
FBXW7	NM_033632	Hotspots
GNA11	NM_002067	Hotspots
GNAQ	NM_002072	Hotspots
GNAS	NM_000516	Hotspots
HNF1A	NM_000545	Hotspots
IDH1	NM_005896	Hotspots
IDH2	NM_002168	Hotspots
JAK2	NM_004972	Hotspots
JAK3	NM_000215	Hotspots
KDR	NM_002253	Hotspots
MLH1	NM_000249	Hotspots
MPL	NM_005373	Hotspots
NOTCH1	NM_017617	Hotspots
NPM1	NM_002520	Hotspots
PIK3CA	NM_006218	Hotspots
PTPN11	NM_002834	Hotspots
RB1	NM_000321	Hotspots
ROS1	NM_002944	Hotspots
SMAD4	NM_005359	Hotspots
SMARCB1	NM_003073	Hotspots
SMO	NM_005631	Hotspots
SRC	NM_198291	Hotspots
STK11	NM_000455	Hotspots
TET2	NM_001127208	Hotspots
