# Supplementary material for: Mutation spectrums of TSC1 and TSC2 in Chinese women with lymphangioleiomyomatosis (LAM)
Source: PLoS One. 2019 Dec 19;14(12):e0226400. doi: 10.1371/journal.pone.0226400 (PMC6922431; doi:10.1371/journal.pone.0226400)
Supplement: S4 Table — (XLSX) [file pone.0226400.s008.xlsx]

## Sheet: Sheet1
S4 Table : Genetic variants in TSC1/2 in the LAM patients
No.	Patient ID	Clinical diagnosis	Gene detection	Category	Targetseq	CMA	MLPA	Origin identified	Origin identified	Gene	Chr	Start	End	Ref	Variant	HGVS(cDNA)	HGVS(protein)	Exon	Mutation type	Substitution	Somatic/Germline	Evidence-Based	LOVD(2.0)	gnomAD	Novel	Tissue 1(VAF%)	Tissue 2(VAF%)	Tissue 3(VAF%)	Tissue 4(VAF%)	Variant read count	Total read count	CMA	MLPA(leukocyte)
1	015	S-LAM	S-LAM	2-hits	Y	N	Y	N	Y(NGS)	TSC2	chr16	2122360	2122367	CCATGGTA	-	NM_000548.4:c.2220+2_2220+9del	N/A	splice	Deletion	splice site	Somatic	Tier II	NA	.	Yes	NMD(lung)	3.3(uterus)	/	/	17	513
1	015			2-hits						TSC1	chr9	135786890	135786890	G	A	NM_000368.4:c.979C>T	p.Pro327Ser	exon10	SNV	missense	Somatic	Tier III	NA	.	Yes	NMD(lung)	2.8(uterus)	/	/	13	466
2	023	S-LAM	S-LAM	2-hits	Y	N	N	N	N	TSC2	chr16	2129125	2129129	TGGAG	-	NM_000548.4:c.3059_3063del	p.Leu1020Profs*146	exon27	Deletion	frameshift	Somatic	Tier II	NA	.	Yes	1.8(lung1)	NMD(lung2)	/	/	27	1535
2	023			2-hits						TSC1	chr9	135779172	135779172	G	A	NM_000368.4:c.2074C>T	p.Arg692*	exon17	SNV	nonsense	Somatic	Tier I	Pathogenic	.	No	2.4(lung1)	NMD(lung2)	/	/	36	1506
3	026	S-LAM	NMI	NMI	Y	N	N	N	N	NMD									/	/	/					NMD(kidney)	/	/	/
4	029	S-LAM	S-LAM	2-hits	Y	N	Y	Y	Y(Sanger)	TSC2	chr16	2104390	2104390	A	T	NM_000548.4:c.430A>T	p.Lys144*	exon5	SNV	nonsense	Somatic	Tier II	NA	.	Yes	19.3(lung)	/	/	/	327	1695
4	029			2-hits						TSC2	chr16	2125798	2125798	A	T	NM_000548.4:c.2546-2A>T	N/A	splice	SNV	splice site	Somatic	Tier II	Pathogenic	.	No	18.9(lung)	/	/	/	245	1293
5	030	S-LAM	S-LAM	1-hit	Y	N	Y	Y	Y(Sanger)	TSC2	chr16	2126116	2126116	G	A	NM_000548.4:c.2687G>A	p.Trp896*	exon24	SNV	nonsense	Somatic	Tier II	Pathogenic	.	No	18.1(lung)	/	/	/	37	202
6	052	TSC-LAM	TSC-LAM	2-hits	Y	Y	Y	N	Y(NGS)	TSC2	chr16	2120548	2120548	C	G	NM_000548.4:c.1808C>G	p.Thr603Ser	exon17	SNV	missense	Germline	VUS	NA	.	Yes	47.5(lung)	/	/	/	705	1485	arr[GRCh37]9q31.1q34.3(104522836_141054761)x2 mos hmz 36.53Mb （LOH）
7	058	TSC-LAM	TSC-LAM	2-hits	Y	N	Y	Y	Y(Sanger)	TSC2	chr16	2137898	2137898	C	T	NM_000548.4:c.5024C>T	p.Pro1675Leu	exon39	SNV	missense	Somatic	Tier I	Pathogenic	.	No	3.4(lung1)	4.1(lung2)	/	/	16/95	471/2337
7	058			2-hits						TSC1	chr9	135797276	135797276	T	C	NM_000368.4:c.593A>G	p.Asn198Ser	exon7	SNV	missense	Germline	VUS	NA	15/246088	No(rs577983115)	51.3(lung1)	46.5(lung2)	/	/	200/856	390/1842
8	068	S-LAM	S-LAM	2-hits	Y	N	N	Y	Y(Sanger)	TSC2	chr16	2111973	2111973	C	G	NM_000548.4:c.1221C>G	p.Tyr407*	exon12	SNV	nonsense	Somatic	Tier II	NA	.	Yes	34.1(retroperitoneal)	/	/	/	104	305
8	068			2-hits						TSC2	chr16	2138086	2138086	C	-	NM_000548.4:c.5106delC	p.Ile1702Metfs*124	exon40	Deletion	frameshift	Somatic	Tier II	NA	.	Yes	29.6(retroperitoneal)	/	/	/	173	585
9	076	TSC-LAM	S-LAM	1-hit	Y	N	Y	N	N	TSC1	chr9	135779172	135779172	G	A	NM_000368.4:c.2074C>T	p.Arg692*	exon17	SNV	nonsense	Somatic	Tier I	Pathogenic	.	No	3.7(lung)	/	/	/	9	245
10	086	S-LAM	S-LAM	2-hits	Y	N	Y	Y	Y(Sanger)	TSC2	chr16	2107112	2107112	C	G	NM_000548.4:c.781C>G	p.Arg261Gly	exon9	SNV	missense	Somatic	Tier III	NA	.	Yes	14.3(lung)	/	/	/	86	603
10	086			2-hits						TSC2	chr16	2111947	2111947	G	A	NM_000548.4:c.1195G>A	p.Glu399Lys	exon12	SNV	missense	Somatic	Tier III	NA	1/246130.	No(COSM5967091)	3.7(lung)	/	/	/	16	434
11	091	S-LAM	NMI	NMI	Y	N	Y	N	N	NMD									/	/	/					NMD(lung)	/	/	/
12	099	S-LAM	S-LAM	1-hit	Y	Y	Y	N	N	TSC2	chr16	2137876	2137876	T	-	NM_000548.4:c.5004delT	p.Phe1668Leufs*4	exon39	Deletion	frameshift	Somatic	Tier II	NA	.	Yes	2.7(lung1)	3.6(lung2)	/	/	13/55	478/1522	LOH(-)
13	105	S-LAM	S-LAM	2-hits	Y	N	Y	N	Y(NGS)	TSC2	chr16	2126142	2126142	C	T	NM_000548.4:c.2713C>T	p.Arg905Trp	exon24	SNV	missense	Somatic	Tier I	Pathogenic	.	No	6(lung)	/	/	/	60	995
13	105			2-hits						TSC2	chr16	2110813	2110813	A	G	NM_000548.4:c.1118A>G	p.Gln373Arg	exon11	SNV	missense	Somatic	Tier III	NA	.	Yes	3.6(lung)	/	/	/	26	729
14	115	S-LAM	S-LAM	1-hit	Y	N	N	N	N	TSC2	chr16	2136816	2136816	-	ACAATGTCTACAATGTCTACA	NM_000548.4:c.4933_4937delinsACAATGTCTACAATGTCTACA	p.Phe1645Thrfs*13	exon38	Insertion	frameshift	Somatic	Tier II	NA	.	Yes	6.8(kidney)	/	/	/	17	249
15	129	S-LAM	NMI	NMI	Y	N	Y	N	N	NMD									/	/	/					NMD(lung)	/	/	/
16	131	TSC-LAM	TSC-LAM	2-hits	Y	N	Y	Y	Y(Sanger)	TSC2	chr16	2122360	2122367	CCATGGTA	-	NM_000548.4:c.2220+2_2220+9del	N/A	splice	Deletion	splice site	Germline	Likely Pathogenic	NA	.	Yes	33.6(lung)	/	/	/	149	443
16	131			2-hits						TSC2	chr16	2131740	2131740	C	T	NM_000548.4:c.3755C>T	p.Ser1252Leu	exon31	SNV	missense	Somatic	Tier III	NA	.	Yes	0.9(lung)	/	/	/	6	666
17	133	S-LAM	S-LAM	2-hits	Y	N	N	N	N	TSC2	chr16	2126172	2126172	G	A	NM_000548.4:c.2742+1G>A	N/A	splice	SNV	splice site	Somatic	Tier II	Pathogenic	.	No	6.6(lung)	/	/	/	44	665
17	133			2-hits						TSC2	chr16	2100412	2100412	G	-	NM_000548.4:c.151delG	p.Glu51Asnfs*10	exon3	Deletion	frameshift	Somatic	Tier II	NA	.	Yes	8.7(lung)	/	/	/	86	986
18	137	S-LAM	S-LAM	2-hits	Y	Y	Y	N	Y(NGS)	TSC2	chr16	2138295	2138295	G	A	NM_000548.4:c.5228G>A	p.Arg1743Gln	exon41	SNV	missense	Somatic	Tier I	Pathogenic	.	No	4.8(lung)	/	/	/	19	395	LOH(-)
18	137			2-hits						TSC1	chr9	135786013	135786013	G	A	NM_000368.4:c.1208C>T	p.Ser403Leu	exon12	SNV	missense	Somatic	Tier III	No known pathogenicity	87/245856	No	2.7(lung)	/	/	/	10	364
19	139	S-LAM	S-LAM	2-hits	Y	Y	Y	Y	Y(Sanger)	TSC2	chr16	2122880	2122880	C	T	NM_000548.4:c.2251C>T	p.Arg751*	exon21	SNV	nonsense	Somatic	Tier I	Pathogenic	.	No	NMD(kidney1)	54.4(kidney2)	/	/	406	746	arr[GRCh37] 16p13.3(83886_2853150)x2 mos hmz 2.77Mb （LOH）
20	140	TSC-LAM	TSC-LAM	1-hit	Y	N	Y	Y	Y(Sanger)	TSC2	chr16	2134598	2134598	C	T	NM_000548.4:c.4375C>T	p.Arg1459*	exon34	SNV	nonsense	Germline	Pathogenic	Pathogenic	.	No	51.2(lung)	/	/	/	576	1124
21	142	S-LAM	S-LAM	2-hits	Y	N	Y	N	Y(NGS)	TSC2	chr16	2115634	2115634	C	-	NM_000548.4:c.1714delC	p.Gln572Argfs*126	exon16	Deletion	frameshift	Somatic	Tier II	NA	.	Yes	3.3(lung)	/	/	/	23	692
21	142			2-hits						TSC2	chr16	2107122	2107122	T	G	NM_000548.4:c.791T>G	p.Leu264Arg	exon9	SNV	missense	Somatic	Tier III	NA	.	No(COSM4915951)	3.1(lung)	/	/	/	40	1290
22	145	S-LAM	NMI	NMI	Y	N	Y	N	N	NMD									/	/	/					NMD(kidney)	/	/	/
23	025	S-LAM	NMI	NMI	Y	N	N	N	N	NMD									/	/	/					NMD(kidney)	/	/	/
24	053	S-LAM	S-LAM	2-hits	Y	Y	Y	Y	Y(Sanger)	TSC2	chr16	2130180	2130180	C	T	NM_000548.4:c.3412C>T	p.Arg1138*	exon30	SNV	nonsense	Somatic	Tier I	Pathogenic	.	No	54.1(pelvic)	/	/	/	3074	5680	arr[GRCh37] 16p13.3p11.2(83886_32137965)x2 mos hmz 32.05Mb （LOH）
25	054	S-LAM	NMI	NMI	Y	N	Y	N	N	NMD									/	/	/					NMD(lung)	/	/	/
26	060	S-LAM	S-LAM	1-hit	Y	N	Y	Y	Y(Sanger)	TSC2	chr16	2104419	2104420	CA	-	NM_000548.4:c.460_461del	p.Thr154Leufs*8	exon5	Deletion	frameshift	Somatic	Tier II	NA	.	Yes	10.5(lung)	/	/	/	263	2507
27	087	S-LAM	S-LAM	2-hits	Y	N	N	N	N	TSC2	chr16	2122241	2122241	G	C	NM_000548.4:c.2098-1G>C	N/A	splice	SNV	splice site	Somatic	Tier II	NA	.	Yes	5.2(lung)	/	/	/	81	1568
27	087			2-hits						TSC2	chr16	2133797	2133797	C	T	NM_000548.4:c.3985C>T	p.Arg1329Cys	exon33	SNV	missense	Somatic	Tier III	NA	2/240838.	No(rs747695245)	3.2(lung)	/	/	/	72	2244
28	100	S-LAM	S-LAM	2-hits	Y	N	N	N	N	TSC2	chr16	2103451	2103451	C	T	NM_000548.4:c.334C>T	p.Gln112*	exon4	SNV	nonsense	Somatic	Tier I	Pathogenic	.	No	5.4(lung)	/	/	/	72	1345
28	100			2-hits						TSC2	chr16	2138275	2138275	C	A	NM_000548.4:c.5208C>A	p.Tyr1736*	exon41	SNV	nonsense	Somatic	Tier II	Pathogenic	.	No	3(lung)	/	/	/	53	1777
29	113	S-LAM	S-LAM	2-hits	Y	Y	Y	Y	Y(Sanger)	TSC2	chr16	2121933	2121933	C	T	NM_000548.4:c.2095C>T	p.Gln699*	exon19	SNV	nonsense	Somatic	Tier II	Pathogenic	.	No	64.8(kidney)	/	/	/	1766	2727	arr[GRCh37] 16p13.3p11.2(83886_28589373)x2 mos hmz 28.51Mb （LOH）
30	124	S-LAM	S-LAM	2-hits	Y	N	N	N	N	TSC2	chr16	2129652	2129652	C	T	NM_000548.4:c.3379C>T	p.Arg1127Trp	exon29	SNV	missense	Somatic	Tier III	Probably no pathogenicity	10/217032	No	4.2(lung)	/	/	/	16	383
30	124			2-hits						TSC2	chr16	2134269	2134269	C	T	NM_000548.4:c.4046C>T	p.Ala1349Val	exon34	SNV	missense	Somatic	Tier III	No known pathogenicity	9/235922	No	4.1(lung)	/	/	/	25	610
31	141	S-LAM	S-LAM	2-hits	Y	Y	Y	Y	Y(Sanger)	TSC2	chr16	2130180	2130180	C	T	NM_000548.4:c.3412C>T	p.Arg1138*	exon30	SNV	nonsense	Somatic	Tier I	Pathogenic	.	No	50.9(kidney)	/	/	/	566	1111	arr[GRCh37] 16p13.3p11.2(83886_30809063)x2 mos hmz 30.73Mb （LOH）
32	143	S-LAM	S-LAM	2-hits	Y	N	Y	N	Y(NGS)	TSC2	chr16	2130180	2130180	C	T	NM_000548.4:c.3412C>T	p.Arg1138*	exon30	SNV	nonsense	Somatic	Tier I	Pathogenic	.	No	7.2(kidney1)	NMD(kidney2)	/	/	84	1170
32	143			2-hits						TSC2	chr16	2098641	2098641	T	C	NM_000548.4:c.25T>C	p.Ser9Pro	exon2	SNV	missense	Somatic	Tier III	NA	.	Yes	0.85(kidney1)	NMD(kidney2)	/	/	11	1299
33	147	S-LAM	S-LAM	2-hits	Y	Y	Y	Y	Y(Sanger)	TSC2	chr16	2122983	2122986	AGGT	-	NM_000548.4:c.2355+2_2355+5del	N/A	splice	Deletion	splice site	Somatic	Tier II	Pathogenic	.	No	24.1(lung)	/	/	/	762	3157	arr[GRCh37] 16p13.3p12.2(83886_22681970)x2 mos hmz 22.60Mb （LOH）
34	148	TSC-LAM	TSC-LAM	2-hits	Y	N	Y	Y	Y(Sanger)	TSC1	chr9	135772987	135772987	A	G	NM_000368.4:c.2636T>C	p.Met879Thr	exon21	SNV	missense	Germline	VUS	NA	.	No(rs754457018)	36.7(lung)	/	/	/	272	741
34	148			2-hits						TSC2	chr16	2134536	2134536	G	A	NM_000548.4:c.4313G>A	p.Arg1438Gln	exon34	SNV	missense	Somatic	Tier III	Probably pathogenic	31/235736	No	1.8(lung)	/	/	/	19	1042
35	150	S-LAM	NMI	NMI	Y	N	Y	N	N	NMD									/	/	/					NMD(lung)	/	/	/
36	152	TSC-LAM	TSC-LAM	3-hits	Y	N	N	Y	Y(Sanger)	TSC2	chr16	2137867	2137867	C	T	NM_000548.4:c.4993C>T	p.Gln1665*	exon39	SNV	nonsense	Somatic	Tier I	Pathogenic	.	No	NMD(lung1)	NMD(lung2)	NMD(lung3)	24.8(retroperitoneal)	408	1647
36	152			3-hits						TSC2	chr16	2104360	2104360	G	T	NM_000548.4:c.400G>T	p.Glu134*	exon5	SNV	nonsense	Somatic	Tier I	NA	.	Yes	NMD(lung1)	NMD(lung2)	NMD(lung3)	25.2(retroperitoneal)	435	1724
36	152			3-hits						TSC2	chr16	2138578	2138580	CTC	-	NM_000548.4:c.5394_5396del	p.Ser1799del	exon42	Deletion	In frame	Germline	VUS	NA	2/241712	No(rs754113521)	43.6(lung1)	39.2(lung2)	42.4(lung3)	43(retroperitoneal)	882	2050
37	153	S-LAM	S-LAM	2-hits	Y	Y	Y	N	N	TSC2	chr16	2137925	2137958	CCCTGCAGTGCAGGAAAGGTAGGGCCGGGTGGGG	-	NM_000548.4:c.5068+27_5069-47del	N/A	splice	Deletion	splice site	Somatic	Tier II	No known pathogenicity	.	No	5.9(lung)	/	/	/	108	1843	LOH(-)
37	153			2-hits						TSC1	chr9	135771698	135771698	G	A	NM_000368.4:c.3419C>T	p.Pro1140Leu	exon23	SNV	missense	Somatic	Tier III	Probably no pathogenicity	13/246126	No	1.16(lung)	/	/	/	30	2563
38	154	S-LAM	TSC-LAM	3-hits	Y	Y	N	Y	Y(Sanger)	TSC2	chr16	2100481	2100485	TGAAG	-	NM_000548.4:c.219_223del	p.Phe73Leufs*51	exon3	Deletion	frameshift	Somatic	Tier II	NA	.	Yes	2(lung1)	25.9(lung2)	/	/	14/79	684/305	LOH(-)
38	154			3-hits						TSC2	chr16	2136213	2136213	T	-	NM_000548.4:c.4682delT	p.Ile1561Thrfs*15	exon37	Deletion	frameshift	Somatic	Tier II	NA	.	Yes	NMD(lung1)	24.4(lung2)	/	/	67	275
38	154			3-hits						TSC2	chr16	2131764	2131764	C	T	NM_000548.4:c.3779C>T	p.Thr1260Met	exon31	SNV	missense	Germline	VUS	NA	4/245456	No(rs776738338)	49.3(lung1)	49.3(lung2)	/	/	427/165	335/867
39	159	S-LAM	S-LAM	2-hits	Y	N	Y	N	N	TSC2	chr16	2126172	2126172	G	T	NM_000548.4:c.2742+1G>T	N/A	splice	SNV	splice site	Somatic	Tier II	Pathogenic	.	No	2.2(lung)	/	/	/	41	1839
39	159			2-hits						TSC2	chr16	2135307	2135307	A	-	NM_000548.4:c.4646delA	p.Tyr1549Leufs*27	exon36	Deletion	frameshift	Somatic	Tier II	Pathogenic	.	No	1.9(lung)	/	/	/	43	2287
40	162	S-LAM	S-LAM	1-hit	Y	Y	N	N	N	TSC2									/	/	Somatic(CNA-CMA)	Tier II				NMD(lung)	/	/	/			arr[GRCh37] 16p13.3(83,886-2,763,816)x2-3 （Gain）
41	130	TSC-LAM	TSC-LAM	2-hits	Y	N	Y	Y	Y(Sanger)	TSC2	chr16	2105522	2105522	T	G	NM_000548.4:c.599+2T>G	N/A	splice	SNV	splice site	Somatic	Tier II	Pathogenic	.	No	5.2(lung)	/	/	/	95	1840
41	130			2-hits						TSC2	chr16	2138286	2138286	G	A	NM_000548.4:c.5219G>A	p.Trp1740*	exon41	SNV	nonsense	Germline	Pathogenic	Pathogenic	.	No	21.5(lung)	/	/	/	678	3160
42	132	S-LAM	NMI	NMI	Y	N	Y	N	N	NMD									/	/	/					NMD(lung)	/	/	/
43	135	S-LAM	NMI	NMI	Y	N	Y	N	N	NMD									/	/	/					NMD(lung)	/	/	/
44	161	S-LAM	NMI	NMI	Y	Y	Y	N	N	NMD									/	/	/					NMD(lung)	/	/	/			LOH(-)
45	165	S-LAM	NMI	NMI	Y	Y	Y	N	N	NMD									/	/	/					NMD(lung)	/	/	/			LOH(-)
46	168	S-LAM	S-LAM	2-hits	Y	Y	N	N	N	TSC2	chr16	2130170	2130170	C	-	NM_000548.4:c.3403delC	p.His1135Metfs*56	exon30	Deletion	frameshift	Somatic	Tier II	Pathogenic	.	No	2.3(lung)	/	/	/	45	1940	LOH(-)
46	168			2-hits						TSC2	chr16	2130268	2130275	AGAAGGCC	-	NM_000548.4:c.3500_3507del	p.Glu1167Valfs*64	exon30	Deletion	frameshift	Somatic	Tier II	NA	.	Yes	2.5(lung)	/	/	/	60	2386
47	169	S-LAM	S-LAM	2-hits	Y	Y	Y	Y	Y(Sanger)	TSC2	chr16	2107119	2107119	T	-	NM_000548.4:c.788delT	p.Leu263Profs*30	exon9	Deletion	frameshift	Somatic	Tier II	NA	.	Yes	NMD(lung1)	73.1(lung2)	/	/	1187	1623	arr[GRCh37] 16p13.3p11.1(83,886-35,271,725) hmz (LOH)
48	171	S-LAM	NMI	NMI	Y	Y	Y	N	N	NMD									/	/	/					NMD(lung)	/	/	/			LOH(-)
49	172	S-LAM	S-LAM	2-hits	Y	Y	Y	Y	Y(Sanger)	TSC2	chr16	2122880	2122880	C	T	NM_000548.4:c.2251C>T	p.Arg751*	exon21	SNV	nonsense	Somatic	Tier I	Pathogenic	.	No	30.6(kidney)	/	/	/	689	2249	arr[GRCh37] 16p13.3p11.2(83886_32529165)x2 mos hmz 32.45Mb （LOH）
50	173	S-LAM	S-LAM	2-hits	Y	N	Y	N	Y(NGS)	TSC2	chr16	2122895	2122895	G	-	NM_000548.4:c.2267delG	p.Gly756Alafs*15	exon21	Deletion	frameshift	Somatic	Tier II	NA	.	Yes	3.7(lung)	/	/	/	107	2863
50	173			2-hits						TSC2	chr16	2129276	2129276	G	-	NM_000548.4:c.3132delG	p.Arg1044Serfs*9	exon28	Deletion	frameshift	Somatic	Tier II	NA	.	Yes	3(lung)	/	/	/	140	4664
51	174	S-LAM	S-LAM	2-hits	Y	Y	Y	Y	Y(Sanger)	TSC2	chr16	2107105	2107105	G	A	NM_000548.4:c.775-1G>A	N/A	splice	SNV	splice site	Somatic	Tier II	Pathogenic	.	No	NMD(lung1)	59(lung2)	/	/	1184	2008	arr[GRCh37] 16p13.3p13.12(83886_14181390)x2 mos hmz 14.10Mb （LOH）
52	175	S-LAM	S-LAM	2-hits	Y	N	N	N	N	TSC2	chr16	2130180	2130180	C	T	NM_000548.4:c.3412C>T	p.Arg1138*	exon30	SNV	nonsense	Somatic	Tier I	Pathogenic	.	No	0.96(lung1)	NMD(lung2)	/	/	15	1565
52	175			2-hits						TSC2	chr16	2111902	2111902	G	A	NM_000548.4:c.1150G>A	p.Val384Ile	exon12	SNV	missense	Somatic	Tier III	Probably no pathogenicity	5/246176	No	1.8(lung1)	NMD(lung2)	/	/	36	1948
53	176	S-LAM	NMI	NMI	Y	Y	Y	N	N	NMD									/	/	/					NMD(lung)	/	/	/			LOH(-)
54	177	S-LAM	S-LAM	2-hits	Y	Y	Y	N	Y(NGS)	TSC2	chr16	2135267	2135267	C	T	NM_000548.4:c.4606C>T	p.Gln1536*	exon36	SNV	nonsense	Somatic	Tier I	Pathogenic	.	No	3.1(lung)	/	/	/	110	3558	LOH(-)
54	177			2-hits						TSC2	chr16	2120569	2120569	T	A	NM_000548.4:c.1829T>A	p.Ile610Asn	exon17	SNV	missense	Somatic	Tier III	NA	.	Yes	3.1(lung)	/	/	/	108	3478
55	180	S-LAM	TSC-LAM	1-hit	Y	N	Y	N	N	TSC2									/	/	Germline	Likely Pathogenic				NMD(lung)	/	/	/				TSC2-Dup E31-42
56	181	S-LAM	S-LAM	2-hits	Y	Y	N	N	N	TSC2	chr16	2126116	2126116	G	A	NM_000548.4:c.2687G>A	p.Trp896*	exon24	SNV	nonsense	Somatic	Tier II	Pathogenic	.	No	0.28(lung)	/	/	/	10	3585	LOH(-)
56	181			2-hits						TSC2	chr16	2112983	2112983	C	T	NM_000548.4:c.1372C>T	p.Arg458*	exon14	SNV	nonsense	Somatic	Tier II	Pathogenic	.	No	1.9(lung)	/	/	/	89	4601
57	182	S-LAM	NMI	NMI	Y	N	N	N	N	NMD									/	/	/					NMD(lung)	/	/	/
58	183	TSC-LAM	S-LAM	2-hits	Y	N	Y	N	N	TSC2	chr16	2134641	2134642	AG	-	NM_000548.4:c.4422_4423del	p.Arg1474Serfs*49	exon34	Deletion	frameshift	Somatic	Tier II	Pathogenic	.	No	NMD(lung)	13.7(kidney)	/	/	410	2993
58	183			2-hits						TSC2	chr16	2138095	2138095	-	CGCA	NM_000548.4:c.5116_5119dupCGCA	p.Asn1707Thrfs*23	exon40	Insertion	frameshift	Somatic	Tier II	NA	.	Yes	NMD(lung)	15(kidney)	/	/	520	3463
59	185	S-LAM	S-LAM	2-hits	Y	Y	N	N	N	TSC2	chr16	2122295	2122296	GC	-	NM_000548.4:c.2153_2154del	p.Arg718Leufs*2	exon20	Deletion	frameshift	Somatic	Tier II	NA	.	Yes	14.2(lung)	/	/	/	337	2372	LOH(-)
59	185			2-hits						TSC2	chr16	2121856	2121856	C	G	NM_000548.4:c.2018C>G	p.Ala673Gly	exon19	SNV	missense	Somatic	Tier III	NA	.	Yes	1.5(lung)	/	/	/	50	3426
60	186	S-LAM	NMI	NMI	Y	Y	Y	N	N	NMD									/	/	/					NMD(lung)	/	/	/			LOH(-)
61	187	TSC-LAM	TSC-LAM	2-hits	Y	Y	Y	Y	Y(Sanger)	TSC1	chr9	135781416	135781416	G	A	NM_000368.4:c.1549C>T	p.Arg517Trp	exon15	SNV	missense	Germline	VUS	NA	.	No(COSM6946254)	50.2(lung)	/	/	/	1362	2715	LOH(-)
61	187			2-hits						TSC1	chr9	135781515	135781515	T	C	NM_000368.4:c.1450A>G	p.Arg484Gly	exon15	SNV	missense	Germline	VUS	NA	.	Yes	50.7(lung)	/	/	/	1196	2360
